# Supplementary material for: Spotless, a reproducible pipeline for benchmarking cell type deconvolution in spatial transcriptomics
Source: eLife. 2024 May 24;12:RP88431. doi: 10.7554/eLife.88431 (PMC11126312; doi:10.7554/eLife.88431)
Supplement: Figure 2—source data 1. [file elife-88431-fig2-data1.xlsx]

## Sheet: Figure 2
method	RMSE	jsd	prc	diverse_distinct	diverse_overlap	dominant_celltype_diverse	dominant_rare_celltype_diverse	missing_celltypes_visium	partially_dominant_celltype_diverse	regional_rare_celltype_diverse	uniform_distinct	uniform_overlap	silver	gold	liver	melanoma	rarecelltype_detection	robustness	avg_runtime	realtime	100spots_30000genes	1000spots_30000genes	10000spots_30000genes	str_100spots_30000genes	str_1000spots_30000genes	str_10000spots_30000genes	proper_method_names	total_rank	num_rank
cell2location	0.824126	0.590453	0.953286	0.803253	0.70515	0.585912	0.766068	0.74528	0.740136	0.79651	0.771949	0.694362	0.899308	0.769512	0.671193	1	0.821349	0.540619	30.3226	30m	29.0833	34.1	60	29m	34m	1h	Cell2location	2.28571	1
rctd	0.831385	0.560382	0.967534	0.715885	0.644809	0.823764	0.693181	0.68769	0.737141	0.692265	0.679784	0.622665	0.862101	0.802077	0.963892	0.852376	0.84702	0.685215	7.94621	8m	1.06667	7.06667	13.1333	1m	7m	13m	RCTD	2.28571	1
spatialdwls	0.757641	0.440405	0.894155	0.670965	0.633971	0.507279	0.691739	0.683754	0.669918	0.637991	0.661326	0.623682	0.765964	0.616822	0.462099	0.426862	0.813969	0.163401	6.17108	6m	2.11667	4.18333	25.7833	2m	4m	26m	SpatialDWLS	3.7619	3
music	0.701115	0.26845	0.906188	0.470396	0.458725	0.496322	0.471803	0.481145	0.464446	0.472834	0.46627	0.458923	0.551923	0.833463	0.247074	0.345691	0.703005	0.00332019	3.49709	3m	0.116667	3.2	60	<1m	3m	1h	MuSiC	5.7619	4
stereoscope	0.603469	0.307735	0.788263	0.611889	0.56718	0.341538	0.612657	0.503066	0.430214	0.610755	0.620257	0.57016	0.622024	0.170347	0.0966473	0.665513	0.790044	0.179042	104.896	1h	60	60	60	3h	4h	8h	Stereoscope	6.33333	5
spotlight	0.48766	0.234551	0.796085	0.406108	0.375333	0.193076	0.420954	0.270014	0.231715	0.408337	0.432371	0.410417	0.333042	0.443826	0.292271	0.880475	0.706713	0.0876733	6.77972	7m	3.26667	4.51667	4.01667	3m	5m	4m	SPOTlight	6.47619	6
seurat	0.508155	0.242377	0.738321	0.403081	0.28781	0.54726	0.352749	0.396142	0.485284	0.400183	0.360356	0.254768	0.386972	0.38566	0.119791	0.140916	0.46186	0.388077	0.888272	<1m	1.21667	1.36667	3.08333	1m	1m	3m	Seurat	7.09524	7
nnls	0.586715	0.23943	0.759355	0.383952	0.346273	0.454782	0.373604	0.395795	0.391254	0.387311	0.377536	0.34024	0.43724	0.605967	0	0.299606	0.599628	0.00518201	0.111287	<1m	0.116667	0.1	1.41667	<1m	<1m	1m	NNLS	7.52381	8
destvi	0.472563	0.174876	0.718183	0.387933	0.377121	0.207017	0.389645	0.339321	0.298299	0.403681	0.416998	0.397515	0.380468	0.064498	0.340886	0.109075	0.750945	0.0385638	30.6912	31m	3.14896	5.28229	37.6323	3m	5m	38m	DestVI	7.90476	9
tangram	0.391776	0.0866535	0.676976	0.292977	0.25572	0.0131963	0.323176	0.130529	0.095179	0.309856	0.3276	0.303574	0.155997	0.215312	0	0.0251836	0.719118	0.149693	0.124162	<1m	0.15	0.05	0.05	<1m	<1m	<1m	Tangram	8.90476	10
stride	0.428266	0.127394	0.630534	0.182083	0.19288	0.148096	0.188349	0.162066	0.136453	0.19316	0.195271	0.197984	0.13762	0.424386	0.293862	0.0717221	0.568785	0.230509	80.1359	1h	60	60	60	1h	1h	1h	STRIDE	9.14286	11
dstg	0.394882	0.0823166	0.530105	0.0802447	0.0998662	0.0427844	0.0912108	0.0704985	0.0575709	0.0863374	0.0813587	0.0960162	0.00975621	0.559598	0.109707	0	0.430206	0.0793129	15.9544	16m	18.1667	18.7167	40.6667	18m	19m	41m	DSTG	10.4286	12
