# Supplementary material for: Spotless, a reproducible pipeline for benchmarking cell type deconvolution in spatial transcriptomics
Source: eLife. 2024 May 24;12:RP88431. doi: 10.7554/eLife.88431 (PMC11126312; doi:10.7554/eLife.88431)
Supplement: Figure 4—source data 1. [file elife-88431-fig4-data1.xlsx]

## Sheet: Figure 4a
method

## Sheet: Figure 4b
x
